# Supplementary material
Source: publisher figshare collection journal article supplement (https://tandf.figshare.com/ndownloader/files/14464136)
Supplement: Supplementary file 1 [file 14464136]

*Supplementary Online Appendix of*

Where Populist Citizens get the News:

An Investigation of News Audience Polarization along Populist Attitudes in Eleven Countries

Anne Schulz

a.schulz@ikmz.uzh.ch

Table A1. Fixed-Effect Logistic Regressions Predicting News Avoidance (Study I).

|  | News Avoidance | | | | News Avoidance (excl. TV use) | | | |
| --- | --- | --- | --- | --- | --- | --- | --- | --- |
|  | *b* | *SE* | *z* |  | *b* | *SE* | *z* |  |
| *fixed effects* |  |  |  |  |  |  |  |  |
| Intercept | 0.53 | 0.48 | 1.10 |  | 0.64 | 0.42 | 1.52 |  |
| Sex (male) | 0.18 | 0.13 | 1.44 |  | 0.03 | 0.10 | 0.27 |  |
| Age | -0.03 | 0.00 | -6.45 | *** | -0.02 | 0.00 | -5.07 | *** |
| Education (high) | -0.63 | 0.16 | -3.96 | *** | -0.73 | 0.13 | -5.77 | *** |
| Need for Cognition | -0.25 | 0.07 | -3.45 | *** | -0.29 | 0.06 | -4.96 | *** |
| Political Interest | -0.81 | 0.06 | -13.30 | *** | -0.67 | 0.05 | -14.58 | *** |
| Political Orientation (r.) | 0.00 | 0.03 | 0.06 |  | 0.00 | 0.02 | 0.04 |  |
| Media Skepticism | -0.08 | 0.09 | -1.00 |  | -0.07 | 0.07 | -1.08 |  |
| Populist Attitudes | -0.32 | 0.15 | -2.10 | * | -0.01 | 0.12 | -0.07 |  |
| *random intercepts* |  |  |  |  |  |  |  |  |
| Intercept Germany | -0.04 |  |  |  | -0.09 |  |  |  |
| Intercept France | 1.08 |  |  |  | 1.55 |  |  |  |
| Intercept Switzerland | 0.16 |  |  |  | 0.05 |  |  |  |
| Intercept Great Britain | 1.52 |  |  |  | 1.59 |  |  |  |
| Intercept Austria | -0.30 |  |  |  | -0.36 |  |  |  |
| Intercept Sweden | 1.05 |  |  |  | 0.81 |  |  |  |
| Intercept Bulgaria | -0.45 |  |  |  | -0.32 |  |  |  |
| Intercept Italy | 0.64 |  |  |  | 0.96 |  |  |  |
| Intercept Netherlands | 1.48 |  |  |  | 1.83 |  |  |  |
| Intercept Poland | -0.19 |  |  |  | -0.14 |  |  |  |
| Intercept USA | 1.13 |  |  |  | 1.33 |  |  |  |
| Nagelkerkes R2 | .17 | | | | .14 | | | |
| *Note.* N=10,570 for all analyses. Unstandardized coefficients. *p < .05. **p < .01. ***p < .001. | | | | | | | | |

Table A2. Fixed-Effect Zero-Inflated Poisson Regressions Predicting the Number of Outlets selected for Different News Media Genres (Study I).

|  | Public TV news | | | | Commercial TV news | | | | Quality Newspapers | | | | Tabloid Newspapers | | | |
| --- | --- | --- | --- | --- | --- | --- | --- | --- | --- | --- | --- | --- | --- | --- | --- | --- |
|  | *b* | *SE* | *z* |  | *b* | *SE* | *z* |  | *b* | *SE* | *z* |  | *b* | *SE* | *z* |  |
| *fixed effects* |  |  |  |  |  |  |  |  |  |  |  |  |  |  |  |  |
| Intercept | -1.36 | 0.25 | -5.43 | *** | -0.38 | 0.15 | -2.59 | ** | -2.13 | 0.16 | -12.98 | *** | -1.29 | 0.21 | -6.22 | *** |
| Sex (female) | -0.08 | 0.02 | -4.27 | *** | 0.08 | 0.02 | 4.27 | *** | -0.01 | 0.03 | -0.28 |  | 0.03 | 0.03 | 1.00 |  |
| Age | 0.01 | 0.00 | 23.54 | *** | 0.00 | 0.00 | 6.33 | *** | 0.00 | 0.00 | 1.79 |  | 0.00 | 0.00 | -2.63 | ** |
| Education (high) | 0.05 | 0.02 | 2.46 | * | -0.06 | 0.02 | -3.44 | *** | 0.26 | 0.03 | 9.73 | *** | -0.05 | 0.03 | -1.80 |  |
| Need for Cognition | 0.05 | 0.01 | 4.46 | *** | 0.04 | 0.01 | 3.77 | *** | 0.17 | 0.02 | 10.68 | *** | 0.05 | 0.02 | 3.02 | ** |
| Political Interest | 0.17 | 0.01 | 19.79 | *** | 0.10 | 0.01 | 12.19 | *** | 0.27 | 0.01 | 21.61 | *** | 0.15 | 0.01 | 11.13 | *** |
| Political Orientation (r.) | -0.01 | 0.00 | -3.15 | ** | 0.02 | 0.00 | 5.43 | *** | 0.00 | 0.00 | 0.86 |  | 0.03 | 0.01 | 4.86 | *** |
| Media Skepticism | -0.03 | 0.01 | -2.63 | ** | -0.02 | 0.01 | -1.85 |  | 0.00 | 0.01 | 0.08 |  | 0.00 | 0.02 | -0.15 |  |
| Populist Attitudes | -0.04 | 0.02 | -1.78 |  | 0.14 | 0.02 | 6.37 | *** | -0.11 | 0.03 | -3.58 | *** | 0.14 | 0.03 | 3.94 | *** |
| *random intercepts* |  |  |  |  |  |  |  |  |  |  |  |  |  |  |  |  |
| Intercept Germany | 0.46 |  |  |  | 0.19 |  |  |  | 0.17 |  |  |  | -1.10 |  |  |  |
| Intercept France | -0.30 |  |  |  | -0.25 |  |  |  | -0.18 |  |  |  | -0.05 |  |  |  |
| Intercept Switzerland | 0.66 |  |  |  | -1.07 |  |  |  | 0.25 |  |  |  | 0.75 |  |  |  |
| Intercept Great Britain | 0.18 |  |  |  | -0.32 |  |  |  | -0.50 |  |  |  | 0.56 |  |  |  |
| Intercept Austria | 0.51 |  |  |  | -0.20 |  |  |  | 0.60 |  |  |  | 0.42 |  |  |  |
| Intercept Sweden | 0.55 |  |  |  | 0.16 |  |  |  | 0.10 |  |  |  | 0.56 |  |  |  |
| Intercept Bulgaria | -0.49 |  |  |  | 0.41 |  |  |  | -0.17 |  |  |  | 0.36 |  |  |  |
| Intercept Italy | 0.02 |  |  |  | 0.20 |  |  |  | 0.66 |  |  |  | -1.02 |  |  |  |
| Intercept Netherlands | 0.28 |  |  |  | -0.18 |  |  |  | -0.94 |  |  |  | 0.10 |  |  |  |
| Intercept Poland | 0.43 |  |  |  | 0.53 |  |  |  | 0.29 |  |  |  | -0.11 |  |  |  |
| Intercept USA | -2.28 |  |  |  | 0.53 |  |  |  | -0.26 |  |  |  | -0.45 |  |  |  |
| *Note.* N=10,570 for all analyses. Unstandardized coefficients. *p < .05. **p < .01. ***p < .001. | | | | | | | | | | | | | | | | |

Table A3. Fixed-Effect Linear Regressions Predicting the Mean Frequency of News Media Genres Use (Study I).

|  | Public TV news | | | | Commercial TV news | | | | Quality Newspapers | | | | Tabloid Newspapers | | | |
| --- | --- | --- | --- | --- | --- | --- | --- | --- | --- | --- | --- | --- | --- | --- | --- | --- |
|  | *b* | *SE* | *t* |  | *b* | *SE* | *t* |  | *b* | *SE* | *t* |  | *b* | *SE* | *t* |  |
| *fixed effects* |  |  |  |  |  |  |  |  |  |  |  |  |  |  |  |  |
| Intercept | -0.89 | 0.27 | -3.25 | ** | 1.01 | 0.33 | 3.01 | ** | -1.06 | 0.23 | -4.68 | *** | 0.03 | 0.26 | 0.10 |  |
| Sex (female) | -0.14 | 0.04 | -3.40 | *** | 0.26 | 0.04 | 5.83 | *** | -0.04 | 0.04 | -1.01 |  | -0.02 | 0.04 | -0.61 |  |
| Age | 0.05 | 0.00 | 33.37 | *** | 0.02 | 0.00 | 17.21 | *** | 0.01 | 0.00 | 11.91 | *** | 0.01 | 0.00 | 6.00 | *** |
| Education (high) | 0.02 | 0.04 | 0.41 |  | -0.32 | 0.05 | -6.68 | *** | 0.29 | 0.04 | 7.17 | *** | -0.20 | 0.04 | -4.63 | *** |
| Need for Cognition | 0.07 | 0.03 | 2.89 | ** | 0.05 | 0.03 | 1.69 |  | 0.18 | 0.02 | 7.89 | *** | 0.07 | 0.02 | 2.91 | ** |
| Political Interest | 0.39 | 0.02 | 20.72 | *** | 0.26 | 0.02 | 12.98 | *** | 0.32 | 0.02 | 19.05 | *** | 0.17 | 0.02 | 9.32 | *** |
| Political Orientation (r.) | -0.02 | 0.01 | -2.04 | * | 0.07 | 0.01 | 8.86 | *** | 0.00 | 0.01 | 0.58 |  | 0.05 | 0.01 | 6.99 | *** |
| Media Skepticism | -0.07 | 0.03 | -2.87 | ** | -0.08 | 0.03 | -3.04 | ** | -0.04 | 0.02 | -1.58 |  | -0.02 | 0.02 | -0.97 |  |
| Populist Attitudes | 0.06 | 0.05 | 1.26 |  | 0.44 | 0.05 | 8.22 | *** | -0.13 | 0.05 | -2.81 | ** | 0.24 | 0.05 | 5.03 | *** |
| *random intercepts* |  |  |  |  |  |  |  |  |  |  |  |  |  |  |  |  |
| Intercept Germany | -0.71 |  |  |  | 0.43 |  |  |  | -1.18 |  |  |  | -0.87 |  |  |  |
| Intercept France | -1.26 |  |  |  | 1.21 |  |  |  | -1.41 |  |  |  | -0.36 |  |  |  |
| Intercept Switzerland | -0.41 |  |  |  | -0.51 |  |  |  | -0.86 |  |  |  | 1.35 |  |  |  |
| Intercept Great Britain | -0.86 |  |  |  | 0.31 |  |  |  | -1.58 |  |  |  | 0.49 |  |  |  |
| Intercept Austria | -0.80 |  |  |  | 0.06 |  |  |  | 0.09 |  |  |  | 0.95 |  |  |  |
| Intercept Sweden | -0.67 |  |  |  | 0.98 |  |  |  | -0.55 |  |  |  | 0.61 |  |  |  |
| Intercept Bulgaria | -1.23 |  |  |  | 2.98 |  |  |  | -1.46 |  |  |  | 0.09 |  |  |  |
| Intercept Italy | -0.68 |  |  |  | 1.84 |  |  |  | -0.15 |  |  |  | -0.84 |  |  |  |
| Intercept Netherlands | -0.09 |  |  |  | 1.20 |  |  |  | -1.87 |  |  |  | 0.10 |  |  |  |
| Intercept Poland | -0.14 |  |  |  | 2.00 |  |  |  | -1.18 |  |  |  | -0.52 |  |  |  |
| Intercept USA | -2.93 |  |  |  | 0.60 |  |  |  | -1.52 |  |  |  | -0.70 |  |  |  |
| R2 | .25 | | | | .22 | | | | .17 | | | | .15 | | | |
| *Note.* N=10,570 for all analyses. Unstandardized coefficients. *p < .05. **p < .01. ***p < .001. | | | | | | | | | | | | | | | | |

Table A4. Fixed-Effect Logistic Regressions Predicting News Avoidance (Study II).

|  | News Avoidance | | | | News Avoidance (excl. TV use) | | | |
| --- | --- | --- | --- | --- | --- | --- | --- | --- |
|  | *b* | *SE* | *z* |  | *b* | *SE* | *z* |  |
| *fixed effects* |  |  |  |  |  |  |  |  |
| Intercept | 4.16 | 0.98 | 4.24 | *** | 2.08 | 0.79 | 2.62 | ** |
| Sex (female) | 0.60 | 0.25 | 2.42 | * | 0.26 | 0.17 | 1.51 |  |
| Age | -0.03 | 0.01 | -3.36 | *** | -0.01 | 0.01 | -2.00 | * |
| Education (high) | -0.29 | 0.32 | -0.88 |  | -0.22 | 0.22 | -1.02 |  |
| Need for Cognition | -0.32 | 0.09 | -3.69 | *** | -0.25 | 0.06 | -3.94 | *** |
| Political Interest | -0.65 | 0.10 | -6.65 | *** | -0.50 | 0.06 | -7.85 | *** |
| Political Orientation (r.) | 0.00 | 0.06 | 0.04 |  | 0.02 | 0.04 | 0.38 |  |
| Media Skepticism | -0.02 | 0.09 | -0.21 |  | -0.05 | 0.07 | -0.78 |  |
| Populist Attitudes | -0.47 | 0.17 | -2.68 | ** | -0.17 | 0.13 | -1.34 |  |
| *random intercepts* |  |  |  |  |  |  |  |  |
| Intercept Zurich | 3.32 |  |  |  | 1.04 |  |  |  |
| Intercept Berlin | 3.92 |  |  |  | 1.60 |  |  |  |
| Intercept Paris | 4.66 |  |  |  | 2.99 |  |  |  |
| Intercept London | 4.85 |  |  |  | 2.73 |  |  |  |
| Nagelkerkes R2 | .23 | | | | .17 | | | |
| *Note.* N=2,165 for all analyses. Unstandardized coefficients. *p < .05. **p < .01. ***p < .001. | | | | | | | | |

Table A5. Fixed-Effect Zero-Inflated Poisson Regressions Predicting the Number of Outlets selected for Different News Media Genres (Study II).

|  | Public TV news | | | | Commercial TV news | | | | Quality Newspapers | | | | Tabloid Newspapers | | | |
| --- | --- | --- | --- | --- | --- | --- | --- | --- | --- | --- | --- | --- | --- | --- | --- | --- |
|  | *b* | *SE* | *z* |  | *b* | *SE* | *z* |  | *b* | *SE* | *z* |  | *b* | *SE* | *z* |  |
| *fixed effects* |  |  |  |  |  |  |  |  |  |  |  |  |  |  |  |  |
| Intercept | -0.66 | 0.23 | -2.83 | ** | -1.50 | 0.21 | -7.04 | *** | -1.00 | 0.24 | -4.12 | *** | -0.80 | 0.37 | -2.17 | * |
| Sex (female) | -0.05 | 0.04 | -1.31 |  | 0.09 | 0.04 | 1.92 |  | 0.05 | 0.05 | 0.99 |  | -0.05 | 0.05 | -0.92 |  |
| Age | 0.01 | 0.00 | 11.52 | *** | 0.00 | 0.00 | 0.84 |  | -0.01 | 0.00 | -4.70 | *** | -0.01 | 0.00 | -3.69 | *** |
| Education (high) | 0.01 | 0.04 | 0.28 |  | -0.11 | 0.05 | -2.05 | * | 0.29 | 0.05 | 5.75 | *** | 0.00 | 0.06 | -0.05 |  |
| Need for Cognition | 0.03 | 0.01 | 1.71 |  | 0.02 | 0.02 | 1.35 |  | 0.03 | 0.02 | 1.34 |  | 0.03 | 0.02 | 1.55 |  |
| Political Interest | 0.17 | 0.01 | 12.03 | *** | 0.08 | 0.02 | 4.58 | *** | 0.32 | 0.02 | 15.81 | *** | 0.14 | 0.02 | 6.61 | *** |
| Political Orientation (r.) | -0.01 | 0.01 | -1.66 |  | 0.05 | 0.01 | 4.38 | *** | -0.01 | 0.01 | -1.24 |  | 0.02 | 0.01 | 1.49 |  |
| Media Skepticism | -0.02 | 0.01 | -1.52 |  | 0.02 | 0.02 | 0.97 |  | -0.02 | 0.02 | -0.88 |  | -0.03 | 0.02 | -1.18 |  |
| Populist Attitudes | -0.06 | 0.03 | -2.14 | * | 0.20 | 0.04 | 5.34 | *** | -0.09 | 0.04 | -2.41 | * | 0.07 | 0.04 | 1.64 |  |
| *random intercepts* |  |  |  |  |  |  |  |  |  |  |  |  |  |  |  |  |
| Intercept Zurich | 0.40 |  |  |  | 0.02 |  |  |  | 0.37 |  |  |  | 0.71 |  |  |  |
| Intercept Berlin | 0.18 |  |  |  | 0.28 |  |  |  | 0.13 |  |  |  | -0.70 |  |  |  |
| Intercept Paris | -0.56 |  |  |  | -0.22 |  |  |  | -0.22 |  |  |  | -0.38 |  |  |  |
| Intercept London | -0.02 |  |  |  | -0.08 |  |  |  | -0.27 |  |  |  | 0.38 |  |  |  |
| *Note.* N=2,165 for all analyses. Unstandardized coefficients. *p < .05. **p < .01. ***p < .001. | | | | | | | | | | | | | | | | |

Table A6. Fixed-Effect Linear Regressions Predicting the Mean Frequency of News Media Genres Use (Study II).

|  | Public TV news | | | | Commercial TV news | | | | Quality Newspapers | | | | Tabloid Newspapers | | | |
| --- | --- | --- | --- | --- | --- | --- | --- | --- | --- | --- | --- | --- | --- | --- | --- | --- |
|  | *b* | *SE* | *t* |  | *b* | *SE* | *t* |  | *b* | *SE* | *t* |  | *b* | *SE* | *t* |  |
| *fixed effects* |  |  |  |  |  |  |  |  |  |  |  |  |  |  |  |  |
| Intercept | -0.58 | 0.42 | -1.39 |  | -1.94 | 0.47 | -4.15 | *** | -0.65 | 0.48 | -1.37 |  | -0.74 | 0.59 | -1.24 |  |
| Sex (female) | 0.05 | 0.09 | 0.50 |  | 0.08 | 0.10 | 0.83 |  | 0.03 | 0.10 | 0.27 |  | 0.17 | 0.09 | 1.88 |  |
| Age | 0.05 | 0.00 | 14.83 | *** | 0.02 | 0.00 | 6.15 | *** | 0.02 | 0.00 | 5.82 | *** | 0.00 | 0.00 | -0.78 |  |
| Education (high) | -0.01 | 0.10 | -0.10 |  | -0.30 | 0.12 | -2.58 | ** | 0.14 | 0.11 | 1.28 |  | 0.07 | 0.10 | 0.69 |  |
| Need for Cognition | 0.01 | 0.04 | 0.36 |  | -0.01 | 0.04 | -0.13 |  | 0.08 | 0.04 | 2.02 | * | 0.06 | 0.04 | 1.67 |  |
| Political Interest | 0.35 | 0.03 | 10.53 | *** | 0.18 | 0.04 | 4.80 | *** | 0.40 | 0.04 | 11.17 | *** | 0.24 | 0.03 | 7.33 | *** |
| Political Orientation (r.) | -0.02 | 0.02 | -0.84 |  | 0.13 | 0.02 | 5.73 | *** | -0.01 | 0.02 | -0.28 |  | 0.06 | 0.02 | 3.13 | ** |
| Media Skepticism | -0.14 | 0.04 | -3.81 | *** | -0.02 | 0.04 | -0.55 |  | -0.09 | 0.04 | -2.14 | * | -0.09 | 0.04 | -2.32 | * |
| Populist Attitudes | 0.06 | 0.07 | 0.80 |  | 0.54 | 0.08 | 6.67 | *** | -0.03 | 0.08 | -0.39 |  | 0.24 | 0.07 | 3.34 | *** |
| *random intercepts* |  |  |  |  |  |  |  |  |  |  |  |  |  |  |  |  |
| Intercept Zurich | -0.81 |  |  |  | -2.35 |  |  |  | -0.26 |  |  |  | 0.57 |  |  |  |
| Intercept Berlin | -0.21 |  |  |  | -1.91 |  |  |  | -0.17 |  |  |  | -1.62 |  |  |  |
| Intercept Paris | -0.96 |  |  |  | -1.36 |  |  |  | -0.94 |  |  |  | -1.10 |  |  |  |
| Intercept London | -0.34 |  |  |  | -2.14 |  |  |  | -1.25 |  |  |  | -0.80 |  |  |  |
| R2 | .20 | | | | .11 | | | | .16 | | | | .21 | | | |
| *Note.* N=2,165 for all analyses. Unstandardized coefficients. Random intercepts are reported in the Online Appendix Table A6. *p < .05. **p < .01. ***p < .001. | | | | | | | | | | | | | | | | |

Table A7. Fixed-Effect Logistic Regressions Predicting Online Only News, Facebook and Twitter Use (Study II).

|  | Online Only News | | | | Facebook | | | | Twitter | | | |
| --- | --- | --- | --- | --- | --- | --- | --- | --- | --- | --- | --- | --- |
|  | *b* | *SE* | *z* |  | *b* | *SE* | *z* |  | *b* | *SE* | *z* |  |
| *fixed effects* |  |  |  |  |  |  |  |  |  |  |  |  |
| Intercept | -4.22 | 1.57 | -2.69 | ** | 1.83 | 0.57 | 3.19 | ** | -0.36 | 0.67 | -0.53 |  |
| Sex (female) | -0.96 | 0.42 | -2.29 | * | 0.32 | 0.14 | 2.31 | * | -0.65 | 0.16 | -4.12 | *** |
| Age | -0.02 | 0.01 | -1.35 |  | -0.02 | 0.00 | -3.38 | *** | -0.02 | 0.01 | -3.21 | ** |
| Education (high) | 0.06 | 0.47 | 0.14 |  | 0.02 | 0.15 | 0.14 |  | 0.14 | 0.17 | 0.85 |  |
| Need for Cognition | -0.01 | 0.14 | -0.06 |  | -0.09 | 0.06 | -1.43 |  | 0.06 | 0.07 | 0.90 |  |
| Political Interest | -0.30 | 0.13 | -2.37 | * | -0.22 | 0.06 | -3.92 | *** | 0.16 | 0.06 | 2.64 | ** |
| Political Orientation (r.) | 0.04 | 0.08 | 0.50 |  | 0.00 | 0.03 | 0.06 |  | 0.01 | 0.03 | 0.31 |  |
| Media Skepticism | 0.66 | 0.17 | 3.88 | *** | -0.01 | 0.06 | -0.19 |  | 0.04 | 0.06 | 0.68 |  |
| Populist Attitudes | -0.02 | 0.32 | -0.05 |  | 0.31 | 0.11 | 2.79 | ** | -0.28 | 0.12 | -2.20 | * |
| *random intercepts* |  |  |  |  |  |  |  |  |  |  |  |  |
| Intercept Zurich | -3.38 |  |  |  | 1.53 |  |  |  | -0.64 |  |  |  |
| Intercept Berlin | -4.92 |  |  |  | 1.89 |  |  |  | -0.71 |  |  |  |
| Intercept Paris | -4.66 |  |  |  | 2.04 |  |  |  | -0.43 |  |  |  |
| Intercept London | -3.92 |  |  |  | 1.86 |  |  |  | 0.39 |  |  |  |
| Nagelkerkes R2 | .11 | | | | .08 | | | | .06 | | | |
| N | 2,165 | | | | 1,278 | | | | 1,278 | | | |
| *Note.* Unstandardized coefficients. Random intercepts are reported in the Online Appendix Table A7.  *p < .05. **p < .01. ***p < .001. | | | | | | | | | | | | |

Table A8. News Media Use Measure in Study I.

| **Stage 1 - Media** | | | |
| --- | --- | --- | --- |
| We would now like to know how you inform yourself about daily political news. What different media play a role? Please think of all the different types of media through which you receive information about politics during the course of a week and check more than one box if necessary.  I find out about daily political news from…  [Scale: 1 (yes, at least now and then); 2 (no, never)] | | | |
| - Television (news or political discussion shows on television) | | | |
| - Printed newspapers (subscription newspapers, weekly or monthly magazines, free or commuter newspapers) | | | |
| - Radio | | | |
| - Facebook and/or Twitter | | | |
| - Online news (blogs, newspaper websites via the PC, smartphone or tablet PC) | | | |
| **Stage 2. A Television - List** | | | |
| You have stated that you use the television to find out about daily political news. Which of the following news programmes do you watch for this purpose at least once a week?  [Scale: multiple choice; per default no option is selected; order of outlets is randomized] | | | |
| **Switzerland** | **Germany** | **France** | **United Kingdom** |
| Tagesschau (SRF) | Tagesschau (Das Erste/ARD) | 19/20 (France 3) | BBC News at Six (BBC1) |
| 10 vor 10 (SRF) | Arte Journal (Arte) | Journal de 20 heures (20 HEURES; France 2) | BBC Newsnight (BBC2) |
| RTS1info (RTS1) | heute (ZDF) | Arte Journal (Arte France) | BBC News at One (BBC1) |
| 20 HEURES (France 2) | heute-journal (ZDF) | Le 19.45 (M6) | BBC News at Ten (BBC1) |
| 19/20 (France 3) | kabel eins news (Kabel 1) | Journal de 20 heures (LE 20H; TF1) | ITV News at 6:30 (ITV1) |
| Rundschau (SRF) | Newstime (ProSieben) | NT1 infos (NT1) | ITV News at Ten (ITV1) |
| 12:45 le journal (RTS1) | Sat.1 Nachrichten (Sat.1) | Autres émissions: | Sky News (Sky News) |
| Couleurs Locales (RTS1) | RTL ll News (RTL2) |  | Channel 4 News (Channel 4) |
| Journal Arte (Arte France) | RTL Aktuell (RTL) |  | Other programmes: |
| Le 19.30 (RTS1) | N24 Nachrichten (N24) |  |  |
| Tele Züri News | Nachrichten (n-tv) |  |  |
| LE 20H (TF1) | Andere Sendung: |  |  |
| Euronews |  |  |  |
| Andere Sendung: |  |  |  |

| **Austria** | **Italy** | **The Netherlands** | **Sweden** |
| --- | --- | --- | --- |
| heute (3sat/ZDF) | TG3 (RAI3) | Het Journaal (BVN) | Landet runt (SVT1) |
| ZIB 1 (19:30 Uhr, ORF 2) | TG2 (RAI2) | Nieuwsuur (NPO2) | God morgon Sverige (SVT1) |
| ZIB 24 (24:00 Uhr, ORF 1) | TG1 (RAI1) | NOS Journaal (NPO1) | ABC (SVT) |
| ZIB 20 (20:00 Uhr, ORF 1) | IL PUNTO (RAI NEWS 24) | NOS op 3 (NPO3) | Värmlandsnytt (SVT) |
| ZIB 2 (22:00 Uhr, ORF 2) | Studio Aperto (Italia 1) | Hart van Nederland (SBS6) | Sydnytt (SVT2) |
| Tagesschau (ARD) | TG4 (Rete 4) | RTL Nieuws (RTL4) | Gävledala (SVT) |
| PULS 4 News (AustriaNews, Puls 4/Pro7/Sat.1) | Sky News (TG 24) | Andere uitzendingen: | Smålandsnytt (SVT) |
| Servus Journal (ServusTV) | TG5 Sera (Canale 5) |  | Rapport (SVT1) |
| RTL aktuell (RTL) | Servizio Pubblico (LA7) |  | Aktuellt (SVT2) |
| ATV Aktuell (ATV) | TG La7 (LA7) |  | Nyhetsmorgon (TV4) |
| Andere Sendung: | Altre trasmissioni: |  | TV4 Nyheterna (TV4) |
|  |  |  | Nyheterna (TV4) |
|  |  |  | Andra sändningar: |
| **Bulgaria** | **Poland** | **United States** |  |
| България новини (Бнт2) | Panorama (TVP2) | PBS NewsHour (PBS) |  |
| По света и у нас (БНT1) | Serwis Info (TVP Info) | Fox Report (FOX News) |  |
| Новини на телевизия Алфа | Wiadomosci (TVP1) | Anderson Cooper 360° (or similar shows on CNN) |  |
| Новини на телевизия СКАТ | Fakty (TVN) | The View (ABC) |  |
| Новините на Нова (Nova TV) | Wydarzenia (Polsat) | 60 Minutes (CBS) |  |
| bTV Новините (bTV) | Informacje dnia (TV Trwam) | ABC World News (ABC) |  |
| Други предавания: | Informacje dnia (Polsat News) | All In with Chris Hayes (or similar shows on MSNBC) |  |
|  | Fakty po Faktach (TVN24) | Special Report with Bret Baier (FOX News) |  |
|  | Inne audycje: | Nightly News (NBC) |  |
|  |  | CBS Evening News (CBS) |  |
|  |  | The O'Reilly Factor (or similar shows on Fox News) |  |
|  |  | Other programs: |  |
| **Stage 2. B Quality & Tabloid Newspapers - List** | | | |
| You have stated that you use printed newspapers and/or magazines to find out about daily political news.  Which of the following printed newspapers (daily papers, commuter newspapers, etc.) do you look at at least once a week?  [Scale: multiple choice; per default no option is selected; order of outlets is randomized] | | | |
| **Switzerland** | **Germany** | **France** | **United Kingdom** |
| Tages-Anzeiger | Die Tageszeitung (taz) | L‘Humanité | Financial Times |
| Le Nouvelliste | Westdeutsche Allgemeine Zeitung | Le Républicain (Essonne) | The Daily Telegraph |
| L'Impartial | Rheinische Post | Figaro (France) | The Times |
| Le Courrier | Frankfurter Rundschau | Paris Normandie | Independent |
| La Tribune de Genève | Welt kompakt | Libération | The Guardian |
| Le Journal du Jura | Frankfurter Allgemeine Zeitung | La Tribune | Metro |
| Le Quotidien Jurassien | Handelsblatt | Les Echos | City A.M. |
| Le Monde (France) | Süddeutsche Zeitung | La Croix | The Daily Mirror |
| La Liberté | Die Welt | Le Monde (France) | The Sun |
| Neue Züricher Zeitung (NZZ) | Bild | 20 Minutes | The Daily Mail |
| Figaro (France) | B.Z. | Le Parisien | The Daily Express |
| 24 Heures | Andere Zeitungen, und zwar: | Métro | London Evening Standard |
| Le Temps |  | Autres journaux, à savoir : | Other newspapers, specifically: |
| 20 Minuten (suisse allemand) |  |  |  |
| Blick |  |  |  |
| 20 Minutes (suisse romande) |  |  |  |
| Le Matin |  |  |  |
| Andere Zeitungen, und zwar: |  |  |  |
| **Austria** | **Italy** | **The Netherlands** | **Sweden** |
| Tiroler Tageszeitung | Il Messaggero | NRC Handelsblad | Goteborgs Posten |
| Österreich | Il Giornale | NRC.next | Sydsvenska Dagbladet |
| Oberösterreichische Nachrichten | Il Mattino | De Volkskrant | Helsingborgs Dagblad |
| Salzburger Nachrichten | Libero | Trouw | Svenska Dagbladet |
| Kleine Zeitung | La Repubblica | Het Financieele Dagblad | Dagen |
| Die Presse | Il Fatto Quotidiano | Algemeen Dagblad | Dagens Nyheter |
| Kurier | L'Unità | De Telegraaf | Dagens Industri |
| Der Standard | La Stampa | Het Parool | Metro |
| Kronen Zeitung | Il Sole 24 Ore | Metro | Expressen |
| Heute | Corriere della Sera | Andere kranten, namelijk: | Aftonbladet |
| Andere Zeitungen, und zwar: | Metro |  | Andra tidningar, dvs: |
|  | Leggo |  |  |
|  | La Nazione |  |  |
|  | Il Resto del Carlino |  |  |
|  | Altri giornali, vale a dire: |  |  |
| **Bulgaria** | **Poland** | **United States** |  |
| Новинар (Novinar) | Puls Biznesu | The Denver Post |  |
| Стандарт (Standard) | Gazeta Gieldy Parkiet | The Washington Post |  |
| ДУМА (Duma) | Gazeta Wyborcza | The Wall Street Journal |  |
| Дневник (Dnevnik) | Nasz Dziennik | Chicago Tribune |  |
| СЕГА (Sega) | Dziennik Gazeta Prawna | The New York Times |  |
| Дневен Труд (Dneven Trud) | Rzeczpospolita | USA Today |  |
| Телеграф (Telegraph) | Fakt | New York Post |  |
| България днес (Bulgaria Today) | Super Express | New York Daily News |  |
| Монитор (Monitor) | Inne gazety, mianowicie: | Chicago Sun-Times |  |
| Други вестници, а именно: |  | Other newspapers: |  |

| **Stage 3. A TV - Frequency** |
| --- |
| You have stated that you watch the following news programmes at least once a week. On how many days of the week do you watch these programmes?  [Scale: 1 (1 day), 2 (2 days), 3 (3 days), 4 (4 days), 5 (5 days), 6 (6 days), 7 (7 days); Respondents were shown all outlets, which they had selected beforehand.] |
| **Stage 3. B Quality and Tabloid Newspapers - Frequency** |
| You have stated that you read the following daily newspaper(s) at least once a week. Please tell us on how many days of the week you do this.  [Scale: 1 (1 day), 2 (2 days), 3 (3 days), 4 (4 days), 5 (5 days), 6 (6 days), 7 (7 days); Respondents were shown all outlets, which they had selected beforehand.] |

Table A9. Categorization of News Outlets Study I.

| **Public TV** | | | |
| --- | --- | --- | --- |
| **Switzerland** | **Germany** | **France** | **United Kingdom** |
| Tagesschau (SRF) | Tagesschau (Das Erste/ARD) | 19/20 (France 3) | BBC News at Six (BBC1) |
| 10 vor 10 (SRF) | Arte Journal (Arte) | Journal de 20 heures (20 HEURES; France 2) | BBC Newsnight (BBC2) |
| RTS1info (RTS1) | heute (ZDF) | Arte journal (Arte France) | BBC News at One (BBC1) |
| 20 HEURES (France 2) | heute-journal (ZDF) |  | BBC News at Ten (BBC1) |
| 19/20 (France 3) |  |  |  |
| Rundschau (SRF) |  |  |  |
| 12:45 le journal (RTS1) |  |  |  |
| Couleurs Locales (RTS1) |  |  |  |
| Journal Arte (Arte France) |  |  |  |
| Le 19.30 (RTS1) |  |  |  |
| **Austria** | **Italy** | **The Netherlands** | **Sweden** |
| heute (3sat/ZDF) | TG3 (RAI3) | Het Journaal (BVN) | Landet runt (SVT1) |
| ZIB 1 (19:30 Uhr, ORF 2) | TG2 (RAI2) | Nieuwsuur (NPO2) | God morgon Sverige (SVT1) |
| ZIB 24 (24:00 Uhr, ORF 1) | TG1 (RAI1) | NOS Journaal (NPO1) | ABC (SVT) |
| ZIB 20 (20:00 Uhr, ORF 1) | IL PUNTO (RAI NEWS 24) | NOS op 3 (NPO3) | Värmlandsnytt (SVT) |
| ZIB 2 (22:00 Uhr, ORF 2) |  |  | Sydnytt (SVT2) |
| Tagesschau (ARD) |  |  | Gävledala (SVT) |
|  |  |  | Smålandsnytt (SVT) |
|  |  |  | Rapport (SVT1) |
|  |  |  | Aktuellt (SVT2) |
| **Bulgaria** | **Poland** | **United States** |  |
| България новини (Бнт2) | Panorama (TVP2) | PBS NewsHour (PBS) |  |
| По света и у нас (БНT1) | Serwis Info (TVP Info) |  |  |
|  | Wiadomosci (TVP1) |  |  |
| **Private TV** | | | |
| **Switzerland** | **Germany** | **France** | **United Kingdom** |
| Tele Züri News | kabel eins news (Kabel 1) | Le 19.45 (M6) | ITV News at 6:30 (ITV1) |
| LE 20H (TF1) | Newstime (ProSieben) | Journal de 20 heures (LE 20H; TF1) | ITV News at Ten (ITV1) |
| Euronews | Sat.1 Nachrichten (Sat.1) | NT1 infos (NT1) | Sky News (Sky News) |
|  | RTL ll News (RTL2) |  | Channel 4 News (Channel 4) |
|  | RTL Aktuell (RTL) |  |  |
|  | N24 Nachrichten (N24) |  |  |
|  | Nachrichten (n-tv) |  |  |

| **Austria** | **Italy** | **The Netherlands** | **Sweden** |
| --- | --- | --- | --- |
| PULS 4 News (AustriaNews, Puls 4/Pro7/Sat.1) | Studio Aperto (Italia 1) | Hart van Nederland (SBS6) | Nyhetsmorgon (TV4) |
| Servus Journal (ServusTV) | TG4 (Rete 4) | RTL Nieuws (RTL4) | TV4 Nyheterna (TV4) |
| RTL aktuell (RTL) | Sky News (TG 24) |  | Nyheterna (TV4) |
| ATV Aktuell (ATV) | TG5 Sera (Canale 5) |  |  |
|  | Servizio Pubblico (LA7) |  |  |
|  | TG La7 (LA7) |  |  |
| **Bulgaria** | **Poland** | **United States** |  |
| Новини на телевизия Алфа | Fakty (TVN) | Fox Report (FOX News) |  |
| Новини на телевизия СКАТ | Wydarzenia (Polsat) | Anderson Cooper 360° (or similar shows on CNN) |  |
| Новините на Нова (Nova TV) | Informacje dnia (TV Trwam) | The View (ABC) |  |
| bTV Новините (bTV) | Informacje dnia (Polsat News) | 60 Minutes (CBS) |  |
|  | Fakty po Faktach (TVN24) | ABC World News (ABC) |  |
|  |  | All In with Chris Hayes (or similar shows on MSNBC) |  |
|  |  | Special Report with Bret Baier (FOX News) |  |
|  |  | Nightly News (NBC) |  |
|  |  | CBS Evening News (CBS) |  |
|  |  | The O'Reilly Factor (or similar shows on Fox News) |  |
| **Quality Newspapers** | | | |
| **Switzerland** | **Germany** | **France** | **United Kingdom** |
| Tages-Anzeiger | Die Tageszeitung (taz) | L‘Humanité | Financial Times |
| Le Nouvelliste | Westdeutsche Allgemeine Zeitung | Le Républicain (Essonne) | The Daily Telegraph |
| L'Impartial | Rheinische Post | Figaro (France) | The Times |
| Le Courrier | Frankfurter Rundschau | Paris Normandie | Independent |
| La Tribune de Genève | Welt kompakt | Libération | The Guardian |
| Le Journal du Jura | Frankfurter Allgemeine Zeitung | La Tribune |  |
| Le Quotidien Jurassien | Handelsblatt | Les Echos |  |
| Le Monde (France) | Süddeutsche Zeitung | La Croix |  |
| La Liberté | Die Welt | Le Monde (France) |  |
| Neue Züricher Zeitung (NZZ) |  |  |  |
| Figaro (France) |  |  |  |
| 24 Heures |  |  |  |
| Le Temps |  |  |  |

| **Austria** | **Italy** | **The Netherlands** | **Sweden** |
| --- | --- | --- | --- |
| Tiroler Tageszeitung | Il Messaggero | NRC Handelsblad | Goteborgs Posten |
| Österreich | Il Giornale | NRC.next | Sydsvenska Dagbladet |
| Oberösterreichische Nachrichten | Il Mattino | De Volkskrant | Helsingborgs Dagblad |
| Salzburger Nachrichten | Libero | Trouw | Svenska Dagbladet |
| Kleine Zeitung | La Repubblica | Het Financieele Dagblad | Dagen |
| Die Presse | Il Fatto Quotidiano |  | Dagens Nyheter |
| Kurier | L'Unità |  | Dagens Industri |
| Der Standard | La Stampa |  |  |
|  | Il Sole 24 Ore |  |  |
|  | Corriere della Sera |  |  |
| **Bulgaria** | **Poland** | **United States** |  |
| Новинар (Novinar) | Puls Biznesu | The Denver Post |  |
| Стандарт (Standard) | Gazeta Gieldy Parkiet | The Washington Post |  |
| ДУМА (Duma) | Gazeta Wyborcza | The Wall Street Journal |  |
| Дневник (Dnevnik) | Nasz Dziennik | Chicago Tribune |  |
| СЕГА (Sega) | Dziennik Gazeta Prawna | The New York Times |  |
|  | Rzeczpospolita |  |  |
| **Tabloid Newspapers/Commuter Press/Free Press** | | | |
| **Switzerland** | **Germany** | **France** | **United Kingdom** |
| 20 Minuten (suisse allemand) | Bild | 20 Minutes | Metro |
| Blick | B.Z. | Le Parisien | City A.M. |
| 20 Minutes (suisse romande) |  | Métro | The Daily Mirror |
| Le Matin |  |  | The Sun |
|  |  |  | The Daily Mail |
|  |  |  | The Daily Express |
|  |  |  | London Evening Standard |
| **Austria** | **Italy** | **The Netherlands** | **Sweden** |
| Kronen Zeitung | Metro | Algemeen Dagblad | Metro |
| Heute | Leggo | De Telegraaf | Expressen |
|  | La Nazione | Het Parool | Aftonbladet |
|  | Il Resto del Carlino | Metro |  |
| **Bulgaria** | **Poland** | **United States** |  |
| Дневен Труд (Dneven Trud) | Fakt | USA Today |  |
| Телеграф (Telegraph) | Super Express | New York Post |  |
| България днес (Bulgaria Today) |  | New York Daily News |  |
| Монитор (Monitor) |  | Chicago Sun-Times |  |
| Note: Open answers (e.g., “Another news show, namely:”) were recoded. | | | |

Table A10. News Media Use Measure in Study II.

| **Stage 1 - Media** | | | |
| --- | --- | --- | --- |
| We would now like to know how you inform yourself about daily political news in the United Kingdom. What different media play a role? Please think of ALL the different types of media through which you receive information about politics during the course of a week and check more than one box if necessary.  I find out about daily political news in the United Kingdom from…  [Scale: 1 (yes, at least now and then); 2 (no, never)] | | | |
| - Television (news or political talk shows via a conventional television set or through broadcaster or show websites or apps). | | | |
| - Daily newspapers, weekly or monthly political magazines, newspapers that are by subscription, free of charge or provided to commuters (in print or in digital form as an e-paper, via website or app). | | | |
| - Radio (via a conventional radio or through broadcaster or show websites or apps). | | | |
| - Social Media (e.g. Facebook, Twitter or YouTube). | | | |
| - Political blogs and/or specialized news sites only available on the Internet. | | | |
| **Stage 2. A Television - List** | | | |
| You have indicated that you use television to inform yourself about daily political events in the United Kingdom – whether via the television set, online using the browser of your computer or via a smartphone or tablet app.  Which of the following news shows do you watch at least once a week (whether via the television set, on an Internet website or using a broadcaster or show app)?  [Scale: multiple choice; per default no option is selected; order of outlets is randomized] | | | |
| **Switzerland** | **Germany** | **France** | **United Kingdom** |
| Tagesschau (SRF; srf.ch) | Arte Journal (Arte; arte.tv) | 20 HEURES (Journal de 20 heures de France 2; france2.fr) | BBC News at Ten (BBC1; bbc.co.uk) |
| Tagesschau und/oder Tagesthemen (ARD; tagesschau.de) | Regionale Nachrichten der Dritten Programme (z.B. RBB, WDR, etc.), und zwar: | 19/20 (France 3; france3.fr) | BBC News at One (BBC1; bbc.co.uk) |
| Schweiz Aktuell (SRF; srf.ch) | Phoenix (phoenix.de) | Arte Journal (Arte; arte.tv) | BBC Newsnight (BBC2; bbc.co.uk) |
| heute und/oder heute-journal (ZDF; heute.de) | heute und/oder heute-journal (ZDF; heute.de) | NT1 infos (NT1; www.tf1.fr/nt1) | BBC News at Six (BBC1; bbc.co.uk) |
| Rundschau (SRF; srf.ch) | Tagesschau und/oder Tagesthemen (ARD; tagesschau.de) | LE 20H (Journal de 20 heures de TF1; tf1.fr) | ITV News at 6:30 (ITV1; itv.com ) |
| 10vor10 (SRF; srf.ch) | Sat.1 Nachrichten (Sat.1; sat1.de) | Le 19.45 (M6; m6.fr) | Sky News (Sky News; news.sky.com/uk) |
| RTL Aktuell (RTL; rtl.de) | RTL Aktuell (RTL; rtl.de) | Une autre émission d'information, à savoir : | ITV News at Ten (ITV1; itv.com) |
| Sat.1 Nachrichten (Sat.1; sat1.de) | Newstime (ProSieben; prosieben.de) |  | Channel 4 News (Channel 4; channel4.com) |
| Regionale Nachrichtensendung(en) (z.B. auf TeleZüri, TV O, Tele M1; ZüriNews) | kabel eins news (Kabel 1; kabeleins.de) |  | A regional news show (e.g., Newyddiion via S4C or ITV News Anglia), namely: |
| n-tv Nachrichten (n-tv; n-tv.de) | N24 Nachrichten (N24; n24.de) |  | Another news show, namely: |
| Pro7 Newstime (Pro7; prosieben.de) | RTL II News (RTL II; rtl2.de) |  |  |
| N24 Nachrichten (N24; n24.de) | Eine andere Nachrichtensendung, und zwar: |  |  |
| Eine andere Nachrichtensendung, und zwar: |  |  |  |
| **Stage 2. B Quality Newspapers - List** | | | |
| You have indicated that you use newspapers and/or magazines to inform yourself about daily political events in the United Kingdom – whether as a printed, as an e-paper, online using the browser of your computer or via a smartphone or tablet app.  We would like to know more about that. Which of the following daily and/or subscription newspapers do you open or visit at least once a week? You will also find the weekend editions of several of the larger daily newspapers listed here. You can select those separately if you read those also, or only read them. The newspapers are listed in alphabetical order (please do not forget, that we always refer to the use of printed newspapers, as well as E-Papers, via website and/or app.):  Which of the following news shows do you watch at least once a week (whether via the television set, on an Internet website or using a broadcaster or show app)?  [Scale: multiple choice; per default no option is selected; outlets were presented in alphabetical order] | | | |
| **Switzerland** | **Germany** | **France** | **United Kingdom** |
| Sonntagszeitung (sonntagszeitung.ch) | Westdeutsche Allgemeine Zeitung (waz.de) | La Croix (la-croix.com) | Daily Telegraph (telegraph.co.uk |
| Tages-Anzeiger (Tagi; tagesanzeiger.ch) | Rheinische Post (rp-online.de) | Le Monde (lemonde.fr) | Financial Times (ft.com) |
| Berner Zeitung (bernerzeitung.ch) | Neues Deutschland (neues-deutschland.de) | L’Humanité (humanite.fr) | The Guardian (theguardian.com) |
| Frankfurter Allgemeine Sonntagszeitung (FAS; faz.net) | Süddeutsche Zeitung Wochenendausgabe (sueddeutsche.de) | Les Echos (lesechos.fr) | The Independent (independend.co.uk) |
| Luzerner Zeitung (luzernerzeitung.ch) | Die Tageszeitung (taz.de) | Le Monde week-end (lemonde.fr) | The Sunday Telegraph (telegraph.co.uk) |
| Le Temps (fr.; letemps.ch) | Frankfurter Allgemeine Sonntagszeitung (FAS; faz.net) | La Tribune (latribune.fr) | The Sunday Times (thetimes.co.uk) |
| St. Galler Tagblatt (tagblatt.ch) | Welt am Sonntag (welt.de) | Libération (liberation.fr) | The Times (thetimes.co.uk) |
| Süddeutsche Zeitung Wochenendausgabe (sueddeutsche.de) | Süddeutsche Zeitung (sueddeutsche.de) | Le Figaro (lefigaro.fr) | A regional newspaper,namely: |
| 24 heures (fr.; 24 heures) | Neue Züricher Zeitung (NZZ; nzz.ch) | Journal quotidien régional, à savoir : | Another daily/subscription newspaper, namely: |
| Südostschweiz (suedostschweiz.ch) | Frankfurter Allgemeine Zeitung (faz.net) | Un autre quotidien/journal sous abonnement, à savoir : |  |
| Frankfurter Allgemeine Zeitung (FAZ, faz.net) | Frankfurter Rundschau (fr-online.de) |  |  |
| Basler Zeitung (bazonline.ch) | Handelsblatt (handelsblatt.com) |  |  |
| Süddeutsche Zeitung (sueddeutsche.de) | Die Welt (auch Welt kompakt; welt.de) |  |  |
| Neue Zürcher Sonntagszeitung (NZZ am Sonntag; nzz.ch) | regionale Tageszeitung(en), und zwar: |  |  |
| az Nordwestschweiz (z.B. Solothurner Zeitung, Aargauer Zeitung; auch online/via App) | Eine andere Tages-/Abonnementzeitung, und zwar: |  |  |
| Neue Zürcher Zeitung (NZZ; nzz.ch) |  |  |  |
| regionale Tageszeitung(en), und zwar: |  |  |  |
| Eine andere Tages-/Abonnementzeitung, und zwar: |  |  |  |
| **Stage 2. C Tabloid Newspapers - List** | | | |
| And which of the following commuter, tabloid, and/or free newspapers do you sometimes peruse or visit? For example, on the way to work the print edition or on your smartphone? Here you will also find the some of the Sunday editions listed that you can click on as well if you also read them or only read them.  [Scale: multiple choice; per default no option is selected; outlets were presented in alphabetical order] | | | |
| **Switzerland** | **Germany** | **France** | **United Kingdom** |
| SonntagsBlick (blick.ch) | B.Z. am Sonntag (bz-berlin.de) | Le Parisien Dimanche (leparisien.fr) | The Sun (thesun.co.uk) |
| 20 Minuten (20min.ch) | Bild am Sonntag (bild.de) | 20 Minutes (20minutes.fr) | The Mail on Sunday (dailymail.co.uk) |
| Blick am Abend (blick.ch) | B.Z. (bz-berlin.de) | Le Parisien (leparisien.fr) | Morning Star (morningstaronline.co.uk) |
| Blick (blick.ch) | Bild-Zeitung (bild.de) | CNews Matin (Direct Matin; cnewsmatin.fr) | Daily Mirror (www.mirror.co.uk) |
| Bildzeitung (bild.de) | Abendzeitung München (AZ; abendzeitung-muenchen.de) | Un autre tabloïd ou journal gratuit, à savoir : | Sunday Mirror (www.mirror.co.uk) |
| Bild am Sonntag (bild.de) | Hamburger Morgenpost (mopo.de) |  | The Sun on Sunday (thesun.co.uk) |
| Eine andere Pendler-/Boulevard- oder Gratiszeitung, und zwar: | Eine andere Pendler-/Boulevard- oder Gratiszeitung, und zwar: |  | Daily Mail (dailymail.co.uk) |
|  |  |  | Sunday Express (express.co.uk) |
|  |  |  | Daily Star Sunday (dailystar.co.uk) |
|  |  |  | City A.M. (cityam.com) |
|  |  |  | Daily Express (express.co.uk) |
|  |  |  | Metro (metro.co.uk) |
|  |  |  | Daily Star (dailystar.co.uk) |
|  |  |  | London Evening Standard (standard.co.uk) |
|  |  |  | Another commuter/tabloid or free newspaper, namely: |

| **Stage 3. A TV - Frequency** |
| --- |
| You have stated that you watch the following news programmes at least once a week to inform yourself about daily political events in the United Kingdom. On how many days of the week do you watch these programmes whether via the television set, online using the browser of your computer or via a smartphone or tablet app?  [Scale: 1 (1 day), 2 (2 days), 3 (3 days), 4 (4 days), 5 (5 days), 6 (6 days), 7 (7 days); Respondents were shown all outlets, which they had selected beforehand.] |
| **Stage 3. B & C Quality and Tabloid Newspapers - Frequency** |
| You have indicated that you regularly use the following newspaper(s), tabloid/commuter newspapers or political magazines (on the internet, as an e-paper, or via an app). Please tell us about how often you do that.  [Scale: 1 (1 day), 2 (2 days), 3 (3 days), 4 (4 days), 5 (5 days), 6 (6 days), 7 (7 days); Respondents were shown all outlets, which they had selected beforehand.] |

Table A11. Categorization of News Outlets Study II.

| **Public TV** | | | |
| --- | --- | --- | --- |
| **Switzerland** | **Germany** | **France** | **United Kingdom** |
| Tagesschau (SRF; srf.ch) | Arte Journal (Arte; arte.tv) | 20 HEURES (Journal de 20 heures de France 2; france2.fr) | BBC News at Ten (BBC1; bbc.co.uk) |
| Tagesschau und/oder Tagesthemen (ARD; tagesschau.de) | Regionale Nachrichten der Dritten Programme (z.B. RBB, WDR, etc.), und zwar: | 19/20 (France 3; france3.fr) | BBC News at One (BBC1; bbc.co.uk) |
| Schweiz Aktuell (SRF; srf.ch) | Phoenix (phoenix.de) | Arte Journal (Arte; arte.tv) | BBC Newsnight (BBC2; bbc.co.uk) |
| heute und/oder heute-journal (ZDF; heute.de) | heute und/oder heute-journal (ZDF; heute.de) |  | BBC News at Six (BBC1; bbc.co.uk) |
| Rundschau (SRF; srf.ch) | Tagesschau und/oder Tagesthemen (ARD; tagesschau.de) |  |  |
| 10vor10 (SRF; srf.ch) |  |  |  |
| **Private TV** | | | |
| **Switzerland** | **Germany** | **France** | **United Kingdom** |
| RTL Aktuell (RTL; rtl.de) | Sat.1 Nachrichten (Sat.1; sat1.de) | NT1 infos (NT1; www.tf1.fr/nt1) | ITV News at 6:30 (ITV1; itv.com ) |
| Sat.1 Nachrichten (Sat.1; sat1.de) | RTL Aktuell (RTL; rtl.de) | LE 20H (Journal de 20 heures de TF1; tf1.fr) | Sky News (Sky News; news.sky.com/uk) |
| Regionale Nachrichtensendung(en) (z.B. auf TeleZüri, TV O, Tele M1; ZüriNews) | Newstime (ProSieben; prosieben.de) | Le 19.45 (M6; m6.fr) | ITV News at Ten (ITV1; itv.com) |
| n-tv Nachrichten (n-tv; n-tv.de) | kabel eins news (Kabel 1; kabeleins.de) |  | Channel 4 News (Channel 4; channel4.com) |
| Pro7 Newstime (Pro7; prosieben.de) | N24 Nachrichten (N24; n24.de) |  |  |
| N24 Nachrichten (N24; n24.de) | RTL II News (RTL II; rtl2.de) |  |  |
| Note: Open answers (e.g., “Another news show, namely:”) were recoded. For categorization of newspaper outlets see Table A2. | | | |

Table A12. Respondent Sample Characteristics for Study I.

|  |  |  | Age |  |  | Female |  |  | Education | |  |  |  |  |
| --- | --- | --- | --- | --- | --- | --- | --- | --- | --- | --- | --- | --- | --- | --- |
|  |  |  |  |  |  |  |  | Pop % | | | Sample % | | |  |
|  | N | Pop Md | Sample Md | Chi2 | Pop % | Sample % | Chi2 | pri | sec | ter | pri | sec | ter | Chi2 |
| Austria | 1000 | 43.0 | 43.01 | 0.10 | 50.35 | 50.50 | 0.01 | 19.6 | 52.3 | 28.1 | 13.4 | 66.7 | 19.9 | 83.19* |
| Bulgaria | 997 | 43.4 | 43.29 | 0.78 | 50.63 | 50.65 | 0.00 | 22.2 | 53.7 | 24.1 | 3.0 | 42.8 | 54.2 | 562.4* |
| France | 993 | 41.0 | 44.20 | 8.77* | 50.94 | 50.96 | 0.00 | 26.0 | 43.6 | 30.4 | 26.9 | 45.3 | 27.8 | 3.18 |
| Germany | 1017 | 45.9 | 45.45 | 3.91* | 49.96 | 50.05 | 0.00 | 19.8 | 56.4 | 23.8 | 19.0 | 58.0 | 23.0 | 1.06 |
| Italy | 1000 | 45.1 | 44.55 | 1.16 | 50.61 | 50.60 | 0.00 | 41.9 | 42.7 | 15.5 | 22.0 | 57.2 | 20.8 | 161.9* |
| Netherlands | 634 | 42.2 | 48.41 | 53.32* | 49.88 | 50.00 | 0.00 | 28.4 | 41.1 | 30.5 | 33.3 | 41.0 | 25.7 | 10.15* |
| Poland | 990 | 39.6 | 42.59 | 14.74* | 50.81 | 50.80 | 0.00 | 15.2 | 60.3 | 24.4 | 14.0 | 55.6 | 30.4 | 19.17* |
| Sweden | 997 | 40.9 | 45.09 | 23.04* | 49.36 | 49.45 | 0.00 | 21.6 | 44.4 | 34.0 | 16.4 | 54.2 | 29.4 | 40.25* |
| Switzerland (ger+fre) | 992 | 42.2 | 43.55 | 0.25 | 49.85 | 50.10 | 0.03 | 17.8 | 46.4 | 35.0 | 17.9 | 45.7 | 36.4 | 0.25 |
| United Kingdom | 1000 | 40.0 | 42.88 | 7.06* | 50.39 | 50.30 | 0.00 | 20.3 | 42.1 | 37.6 | 14.8 | 52.8 | 32.4 | 49.29* |
| United States | 950 | 37.3 | 43.23 | 30.10* | 51.40 | 50.00 | 0.75 | 12.2 | 58.0 | 29.8 | 11.5 | 63.1 | 25.4 | 11.10* |
| Note: For the European countries, the population parameter stem from Eurostat data for the year 2015. For the United States, population parameter were taken from Census 2013 (age and gender) and Census 2015 (education). *p<.05. | | | | | | | | | | | | | | |

Table A13. Respondent Sample Characteristics for Study II.

|  |  |  | Age |  |  | Female |  |  | Education | |  |  |  |  |
| --- | --- | --- | --- | --- | --- | --- | --- | --- | --- | --- | --- | --- | --- | --- |
|  |  |  |  |  |  |  |  | Pop % | | | Sample % | | |  |
|  | N | Pop Md | Sample Md | Chi2 | Pop % | Sample % | Chi2 | pri | sec | ter | pri | sec | ter | Chi2 |
| Germany | 553 | 41.0 | 49.0 | 6,21* | 50.94 | 50,81 | 0,16 | 19.8 | 56.4 | 23.8 | 7,8 | 68,7 | 23,5 | 35,71* |
| France | 533 | 45.9 | 51.0 | 21,32* | 49.96 | 52,16 | 0,32 | 26.0 | 43.6 | 30.4 | 27,6 | 47,5 | 25,0 | 3,98* |
| United Kingdom | 530 | 42.2 | 47.0 | 29,02* | 49.85 | 51,70 | 0,36 | 20.3 | 42.1 | 37.6 | 24,0 | 42,3 | 33,8 | 2,67* |
| Switzerland (german) | 549 | 40.0 | 48.0 | 17,01* | 50.39 | 50,64 | 0,14 | 17.8 | 46.4 | 35.0 | 19,3 | 48,5 | 32,2 | 1,22* |
| Note: For the European countries, the population parameter stem from Eurostat data for the year 2016. *p<.05. | | | | | | | | | | | | | | |

Table A14. Item Wording, Means and Standard Deviations of all Control Variables for Study I.

| **Predictor and Item Wording** | **Mean** | **SD** | **Cronbach’s Alpha** |
| --- | --- | --- | --- |
| **Political Interest** |  |  |  |
| How interested would you say you are in politics? Please answer on a scale ranging from "not at all interested" to "very interested"?  [Scale: from 1 (not at all interested) to 5 (very interested)] | 3.30 | 1.17 | - |
| **Political Orientation** |  |  |  |
| In politics people sometimes talk of “left” and “right”. Where would you place yourself on a scale ranging from “left” to “right”?  [Scale: from 1 (left) to 11 (right)] | 6.04 | 2.60 | - |
| **Media Perceptions** |  |  |  |
| [Scale: from 1 (do not agree at all) to 5 (agree completely)]  There are hardly any media reports that write exactly what I think about [country] politics. | 3.55 | 1.10 | .834 |
| I find media coverage about British politics biased. | 3.47 | 1.04 |
| Most news media report more about the views of others rather than my view. | 3.51 | 1.08 |
| Overall media coverage is one-sided. | 3.53 | 1.10 |
| **Populist Attitudes** |  |  |  |
| [Scale: from 1 (strongly disagree) to 5 (strongly agree)]  MPs in Parliament very quickly lose touch with ordinary people. (anti) | 4.12 | 1.00 | .856 |
| The differences between ordinary people and the ruling elite are much greater than the differences between ordinary people. (anti) | 3.97 | 1.06 |
| People like me have no influence on what the government does. (anti) | 3.75 | 1.20 |
| Politicians talk too much and take too little action. (anti) | 4.22 | 0.98 |
| Ordinary people all pull together. (hom) | 2.95 | 1.16 |
| Ordinary people are of good and honest character. (hom) | 3.28 | 1.10 |
| Ordinary people share the same values and interests. (hom) | 3.18 | 1.14 |
| Although the British are very different from each other, when it comes down to it they all think the same. (hom) | 2.88 | 1.20 |
| The people should have the final say on the most important political issues by voting on them directly in referendums. (sov) | 3.86 | 1.12 |
| The people should be asked whenever important decisions are taken. (sov) | 3.87 | 1.12 |
| The people, not the politicians, should make our most important policy decisions. (sov) | 3.51 | 1.15 |
| The politicians in Parliament need to follow the will of the people. (sov) | 4.07 | 0.98 |
| **Need for Cognition** |  |  |  |
| [Scale: from 1 (does not apply at all) to 5 (applies completely)]  I really enjoy a task that involves coming up with new solutions to problems. | 3.81 | 0.99 | .788 |
| I like tasks that require a lot of thought and mental effort. | 3.61 | 1.01 |
| I find satisfaction in deliberating hard and for long hours. | 3.24 | 1.09 |
| **Income (ESS)** |  |  |  |
| Using this scale, please indicate which letter describes your household's total income after tax and compulsory deductions, from all sources? If you don't know the exact figure, please give an estimate.  [Scale: 11 response categories ranging from (A) a very low country specific income category to (J) a very high country specific income category, and (K) “no answer”] | - | - | - |
| Note: For all parameters N = 10,570. | | | |

Table A15. Item Wording, Means and Standard Deviations of all Control Variables for Study II.

| **Predictor and Item Wording** | **Mean** | **SD** | **Cronbach’s Alpha** |
| --- | --- | --- | --- |
| **Political Interest** |  |  |  |
| [Scale: from 1 (not interested at all) to 7 (very interested)]  What would you say? How interested are you in politics? | 4.66 | 1.67 | .903 |
| [Scale: from 1 (do not agree at all) to 7 (agree completely)]  I often talk about politics with friends, acquaintances or family members. | 4.21 | 1.83 |
| I get informed about politics on a daily basis. | 4.38 | 1.90 |
| I think a lot about what I hear on the news. | 4.48 | 1.67 |
| **Political Orientation** |  |  |  |
| [Scale: from 1 (left) to 11 (right)]  In politics people sometimes talk of “left” and “right”. Where would you place yourself on a scale ranging from “left” to “right”? | 5.38 | 2.20 | - |
| **Media Perceptions** |  |  |  |
| [Scale: from 1 (do not agree at all) to 7 (agree completely)]  There are hardly any media reports that write exactly what I think about [country] politics. | 4.24 | 1.65 | .822 |
| I find media coverage about British politics biased. | 4.36 | 1.70 |
| Most news media report more about the views of others rather than my view. | 3.99 | 1.54 |
| Overall media coverage is one-sided. | 4.27 | 1.63 |
| **Populist Attitudes** |  |  |  |
| [Scale: from 1 (strongly disagree) to 5(strongly agree)]  MPs in Parliament very quickly lose touch with ordinary people. (anti) | 3.99 | 1.02 | .846 |
| The differences between ordinary people and the ruling elite are much greater than the differences between ordinary people. (anti) | 3.91 | 1.11 |
| People like me have no influence on what the government does. (anti) | 3.57 | 1.27 |
| Politicians talk too much and take too little action. (anti) | 4.10 | 1.01 |
| Ordinary people all pull together. (hom) | 2.79 | 1.12 |
| Ordinary people are of good and honest character. (hom) | 3.11 | 1.10 |
| Ordinary people share the same values and interests. (hom) | 3.09 | 1.15 |
| Although the British are very different from each other, when it comes down to it they all think the same. (hom) | 2.80 | 1.17 |
| The people should have the final say on the most important political issues by voting on them directly in referendums. (sov) | 3.81 | 1.12 |
| The people should be asked whenever important decisions are taken. (sov) | 3.89 | 1.09 |
| The people, not the politicians, should make our most important policy decisions. (sov) | 3.42 | 1.15 |
| The politicians in Parliament need to follow the will of the people. (sov) | 4.06 | 0.95 |
| **Need for Cognition** |  |  |  |
| [Scale: from 1 (does not apply at all) to 7 (applies completely)]  I really enjoy a task that involves coming up with new solutions to problems. | 4.88 | 1.53 | .893 |
| I like tasks that require a lot of thought and mental effort. | 5.02 | 1.52 |
| I think it's especially satisfying to complete a meaningful task that requires a lot of thinking and mental effort. | 5.24 | 1.50 |
| **Income (ESS)** |  |  |  |
| Using this scale, please indicate which letter describes your household's total income after tax and compulsory deductions, from all sources? If you don't know the exact figure, please give an estimate.  [Scale: 11 response categories ranging from (A) a very low country specific income category to (J) a very high country specific income category, and (K) “no answer”] | - | - | - |
| Note: For all parameters N = 2,165. | | | |
